# Supplementary material for: An Analysis of the Spatial Characteristics and Transport Fluxes of BTEX in Soil and Atmospheric Phases at a Decommissioned Steel Mill Site in China with a Long History
Source: MDPI journal article supplement (doi:10.3390/toxics11100868), 2023-10-18
Supplement: s1 [file s1]

# Supplementary Materials: An Analysis of the Spatial Characteristics and Transport Fluxes of BTEX in Soil and Atmospheric Phases at a Decommissioned Steel Mill Site in China with a Long History

Xuwei Li, Wenyi Xie, Da Ding, Mengjie Wang, Lingya Kong, Dengdeng Jiang and Shaopo Deng

## 1. Construction of the Fugacity Model

**Table S1.** Main physicochemical parameters of the target compounds [35,36].

| Name of substance | M(g·mol <sup>-1</sup> ) | K <sub>ow</sub> | P <sub>L</sub> (Pa) | P <sub>LS</sub> (Pa) | S(mol·m <sup>-3</sup> ) |
|-------------------|-------------------------|-----------------|---------------------|----------------------|-------------------------|
| Benzene           | 78.11                   | 134.90          | 12700               | 3535                 | 0.022788                |
| Ethylbenzene      | 106.17                  | 1412.54         | 1352                | 147                  | 0.001592                |
| o-Xylene          | 106.17                  | 1318.26         | 885                 | 172                  | 0.001677                |

Note: M is the molecular mass; P<sub>L</sub> is the vapor pressure at 25°C; P<sub>LS</sub> is the vapor pressure of super-cooled liquid at 0°C; S is the solubility at 25°C.

**Table S2.** Environmental parameters of the study area[37].

| Parameters                                                | Atmosphere | Soil  |
|-----------------------------------------------------------|------------|-------|
| R(Pa·m <sup>3</sup> ·mol <sup>-1</sup> ·K <sup>-1</sup> ) | 8.314      | -     |
| T(K)                                                      | 298        | -     |
| V <sub>13</sub>                                           | 1.04E-10   | -     |
| V <sub>31</sub>                                           | -          | 0.2   |
| V <sub>32</sub>                                           | -          | 0.3   |
| V <sub>33</sub>                                           | -          | 0.5   |
| y <sub>oc</sub> *                                         | -          | 0.011 |
| q <sub>s</sub> *(kg·m <sup>-3</sup> )                     | -          | 2.01  |

Note: \* is the actual test value; R is the gas constant; T is the temperature; V<sub>13</sub> is the volume fraction of particulate matter in the air; V<sub>31</sub> is the volume fraction of air in the soil; V<sub>32</sub> is the volume fraction of moisture in the soil; V<sub>33</sub> is the volume fraction of soil particles in the soil; y<sub>oc</sub> is the mass fraction of organic carbon in the soil; and q<sub>s</sub> is the density of the soil.

**Table S3.** Migration parameters in the study area [37].

| Parameters                                                   | Notation        | Numerical value         | Unit                            |
|--------------------------------------------------------------|-----------------|-------------------------|---------------------------------|
| Gas-side mass transfer coefficient at the soil/gas interface | K <sub>SA</sub> | 1.00                    | m·h <sup>-1</sup>               |
| Diffusion path length in soil                                | Y <sub>3</sub>  | 0.05                    |                                 |
| Molecular diffusion coefficient in air                       | B <sub>A3</sub> | 0.04                    | m <sup>2</sup> ·h <sup>-1</sup> |
| Molecular diffusion coefficient in water                     | B <sub>W3</sub> | 0.000004                | m <sup>2</sup> ·h <sup>-1</sup> |
| Clearance                                                    | Q               | 200000                  |                                 |
| Air-soil exchange area *                                     | A <sub>13</sub> | Size of the study areas | m <sup>2</sup>                  |
| Air-water exchange area *                                    | A <sub>12</sub> | Size of the study areas | m <sup>2</sup>                  |
| Precipitation rate *                                         | U <sub>Q</sub>  | 0.00011283              | m·h <sup>-1</sup>               |
| Dry deposition rate                                          | U <sub>P</sub>  | 10.8                    | m·h <sup>-1</sup>               |

Note: \* are actual test values.

## 2. Human Health Risk Assessment Methods [39]

### 2.1. Calculation of exposure by different routes

(1) Oral route of soil ingestion

Carcinogenic risk formula:

$$OISER_{ca} = \frac{(\frac{OSIR_c \times ED_c \times EFC}{BW_c} + \frac{OSIR_a \times ED_a \times EFA}{BW_a}) \times ABS_o}{AT_{ca}} \times 10^{-6}$$

Non-cancer risk formula:

$$OISER_{nc} = \frac{OSIR_c \times ED_c \times EFC \times ABS_o}{BW_c \times AT_{nc}} \times 10^{-6}$$

(2) Dermal route of exposure to soil

Carcinogenic risk formula:

$$DCSER_{ca} = \frac{SAEC \times SSAR_c \times EFC \times ED_c \times Ev \times ABS_d}{BW_c \times AT_{ca}} \times 10^{-6} + \frac{SAEa \times SSAR_a \times EFA \times ED_a \times Ev \times ABS_d}{BW_a \times AT_{ca}} \times 10^{-6}$$

Carcinogenic risk formula:

$$DCSER_{nc} = \frac{SAEC \times SSAR_c \times EFC \times ED_c \times Ev \times ABS_d}{BW_c \times AT_{nc}} \times 10^{-6}$$

(3) Exposure routes for inhaled soil particles

Carcinogenic risk formula:

$$PISER_{ca} = \frac{PM_{10} \times DAIR_c \times ED_c \times PIAF \times (f_{spo} \times EFO_c + f_{spi} \times EFI_c)}{BW_c \times AT_{ca}} \times 10^{-6} + \frac{PM_{10} \times DAIR_a \times ED_a \times PIAF \times (f_{spo} \times EFO_a + f_{spi} \times EFI_a)}{BW_a \times AT_{ca}} \times 10^{-6}$$

Carcinogenic risk formula:

$$PISER_{nc} = \frac{PM_{10} \times DAIR_c \times ED_c \times PIAF \times (f_{spo} \times EFO_c + f_{spi} \times EFI_c)}{BW_c \times AT_{nc}} \times 10^{-6}$$

(4) Exposure pathways for volatile contaminants from inhalation of outdoor surface soils

Carcinogenic risk formula:

$$IOVER_{cal} = VF_{suroa} \times (\frac{DAIR_c \times EFO_c \times ED_c}{BW_c \times AT_{ca}} + \frac{DAIR_a \times EFO_a \times ED_a}{BW_a \times AT_{ca}})$$

Carcinogenic risk formula:

$$IOVER_{nc1} = VF_{suroa} \times \frac{DAIR_c \times EFO_c \times ED_c}{BW_c \times AT_{nc}}$$

Where: the subscript c represents children and a represents adults;  $OISER_{ca}$ ,  $DCSER_{ca}$ ,  $PISER_{ca}$  and  $IOVER_{cal}$  represent soil exposures from oral ingestion, dermal contact, inhalation of soil particulate matter, and inhalation of volatile contaminants in outdoor surface soil, respectively,  $kg\ soil \cdot kg^{-1} \cdot weight \cdot d^{-1}$ ;  $ABS_o$  and  $ABS_d$  are absorption efficiency factors for oral and dermal uptake, respectively, dimensionless and taken as 1;  $CR_{ois}$ ,  $CR_{dcs}$  and  $CR_{pis}$  represent carcinogenic risks from the oral soil ingestion pathway, dermal soil contact pathway, and inhalation of soil particulate matter pathway, dimensionless;  $C_{sur}$  is the contaminant content in topsoil,  $\mu g \cdot g^{-1}$ ;  $SER$  is the percentage of exposed skin, dimensionless;  $C(PM_{10})$  is the airborne PM mass concentration,  $mg \cdot m^{-3}$ , taken as the annual average mass concentration in the region in 2021,  $0.062\ mg \cdot m^{-3}$ .

## 2.2. Calculation of carcinogenicity risk and hazard quotient

CR= Exposure by exposure route  $\times C_{\text{sur}} \times$  Carcinogenic Slope Factors or Factors by Exposure Pathway

HQ= Exposure by exposure route  $\times C_{\text{sur}} /$  Reference dose by exposure route  $\times$  SAF

Where: CR is the carcinogenic risk of the contaminant; HQ is the hazard quotient of the contaminant;  $C_{\text{sur}}$  is the concentration of the contaminant in the surface soil,  $\text{mg}\cdot\text{kg}^{-1}$ ; SAF is the reference dose partition coefficient for exposure to soil.

## References

35. Linstrom, P. Nist chemistry webbook, nist standard reference database number 69. *J. Chem. Eng. Data* **1998**, *9*, 1059–1063. <https://doi.org/10.1021/je000236i>.
36. Haynes, W.M. *CRC Handbook of Chemistry and Physics*; CRC Press: Boca Raton, FL, USA, 2014. Available online: <https://analysischomp.com/CRCHandbook01.pdf> (accessed on 1 June 2023).
37. Parnis, J.M.; Mackay, D. *Multimedia Environmental Models: The Fugacity Approach*; CRC press: Boca Raton, FL, USA, 2020. <https://doi.org/10.1201/9781420032543>.
39. HJ 25.3-2019; Technical Guidelines for Risk Assessment of Soil Contamination of Land for Construction. China Environmental Science Press: Beijing, China, 2019. Available online: [https://www.mee.gov.cn/ywggz/fgbz/bz/bzwb/trhj/201912/t20191224\\_749893.shtml](https://www.mee.gov.cn/ywggz/fgbz/bz/bzwb/trhj/201912/t20191224_749893.shtml) (accessed on June 2023).
